# Supplementary material for: Normalization of overweight and obesity in family relations: a personal network analysis study
Source: Research Square preprint supplement (doi:10.21203/rs.3.rs-8059527/v1), 2025-11-13
Supplement: Supplementary file 1 [file 4431ed4354d17f281dd7cf2f.pdf]

# Supplementary Material

Supplementary tables and figures for:

*Normalization of overweight and obesity  
in family relations: a personal network analysis study*

Iulian Oană<sup>1-2\*</sup>

Marian-Gabriel Hâncean<sup>1-2</sup>

Marius Geantă<sup>2</sup>

Cosmina Cioroboiu<sup>2</sup>

Isidro Maya-Jariego<sup>3</sup>

Jürgen Lerner<sup>4</sup>

Bianca-Elena Mihăilă<sup>1-2</sup>

Bogdan-Adrian Vidrașcu<sup>1-2</sup>

<sup>1</sup>Department of Sociology, University of Bucharest, Panduri 90-92, 050663, Bucharest, Romania

<sup>2</sup>Center for Innovation in Medicine, Th. Pallady 42J, 032266, Bucharest, Romania

<sup>3</sup>Social Psychology Department, Universidad de Sevilla, Calle Camilo José Cela s/n, 41018, Seville, Andalucía, Spain

<sup>4</sup>Department of Computer and Information Science, University of Konstanz, Universitaetsstrasse 10, 78464, Konstanz, Germany

\*Corresponding author; email: [iulian.oana@sas.unibuc.ro](mailto:iulian.oana@sas.unibuc.ro)

## Contents

|                                                                                                                                        |   |
|----------------------------------------------------------------------------------------------------------------------------------------|---|
| Figure S1. Interaction plot for predicted probabilities of accuracy based on alter BMI category and ego-alterfamily relation . . . . . | 3 |
| Table S1. Independent samples t-test comparing mean ego underestimation scores for family vs. non-family evaluations . . . . .         | 4 |
| Table S2. Independent samples t-test comparing mean alter underestimation scores for family vs. non-family evaluations . . . . .       | 4 |

This is the Supplementary Material file corresponding to the manuscript titled: **Normalization of overweight and obesity in family relations: a personal network analysis study.**

This document contains *only the supplementary figures and tables mentioned in the article*. For a full description of the data, R code, and detailed analyses, please see the R Quarto document (qmd) and the associated html output, that can be found in the Zenodo repository: <https://doi.org/10.5281/zenodo.17209784>. At this repository you can find the data and code for replicating all the analyses presented in the body of the manuscript.

**Figure S1. Interaction plot for predicted probabilities of accuracy based on alter BMI category and ego-alterfamily relation**

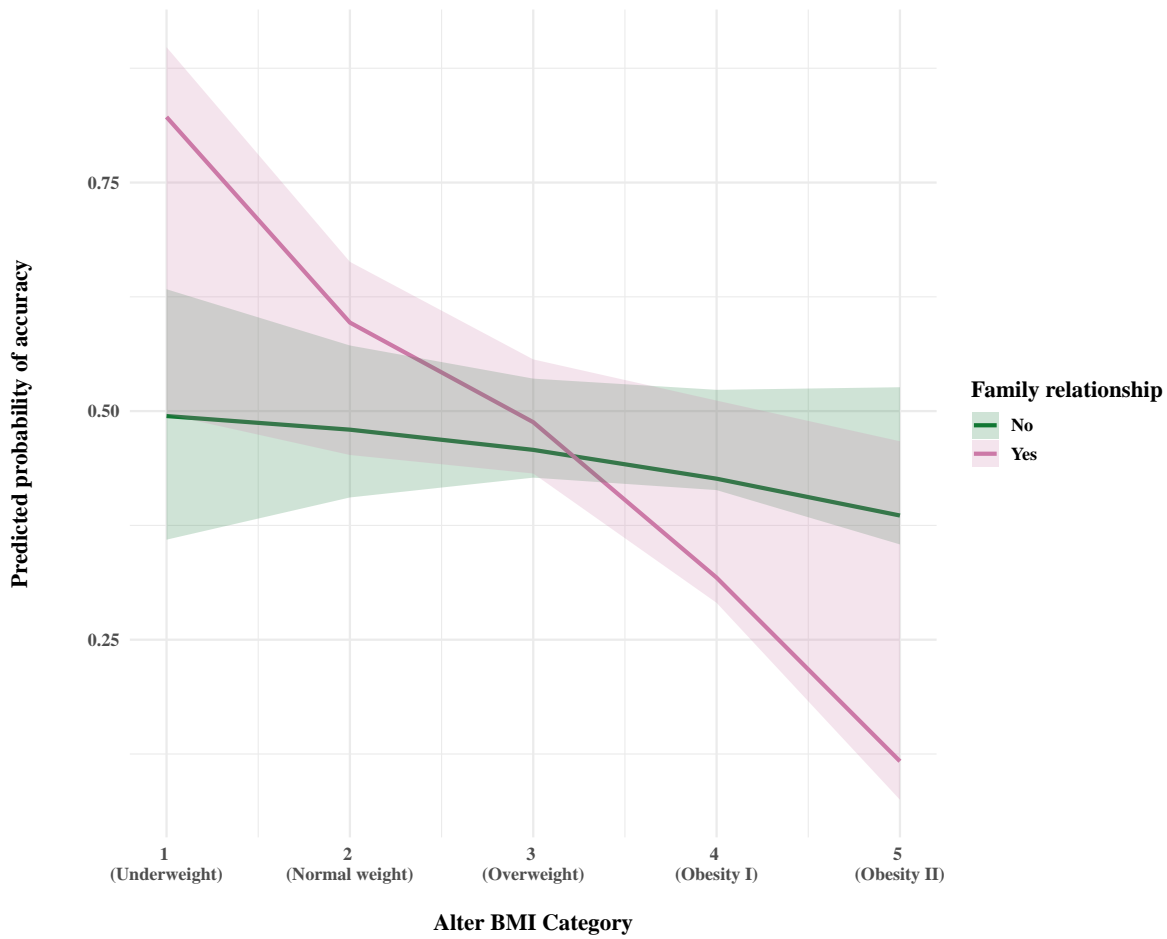

Figure S1: Interaction plot for predicted probabilities of accuracy based on alter BMI category and ego-alter family relation

**Table S1. Independent samples t-test comparing mean ego underestimation scores for family vs. non-family evaluations**

Homogeneity of variance across groups, in order to see what type of t-test to compute:

**Levene's test**

```
## Levene's Test for Homogeneity of Variance (center = median)
##           Df F value Pr(>F)
## group    1  0.2128 0.6453
##           129
```

**Fligner-Killeen test**

```
##
## Fligner-Killeen test of homogeneity of variances
##
## data: mean_pd by fam_rel
## Fligner-Killeen:med chi-squared = 1.4426, df = 1, p-value = 0.2297
```

**Table S1**

| Method            | Alternative | Mean 1 | Mean 2 | $M_1 - M_2$ | $t$  | $df$ | $p$  | 95% CI        |
|-------------------|-------------|--------|--------|-------------|------|------|------|---------------|
| Two Sample t-test | two.sided   | 0.36   | 0.28   | 0.07        | 1.13 | 129  | .261 | [-0.06, 0.21] |

**Table S2. Independent samples t-test comparing mean alter underestimation scores for family vs. non-family evaluations**

Homogeneity of variance across groups, in order to see what type of t-test to compute:

**Levene's test**

```
## Levene's Test for Homogeneity of Variance (center = median)
##           Df F value Pr(>F)
## group    1  0.1206 0.729
##           124
```

**Fligner-Killeen test**

```
##
## Fligner-Killeen test of homogeneity of variances
##
## data: mean_pd by fam_rel
## Fligner-Killeen:med chi-squared = 0.42069, df = 1, p-value = 0.5166
```

**Table S2**

| Method            | Alternative | Mean 1 | Mean 2 | $M_1 - M_2$ | $t$  | $df$ | $p$  | 95% CI        |
|-------------------|-------------|--------|--------|-------------|------|------|------|---------------|
| Two Sample t-test | two.sided   | 0.39   | 0.32   | 0.07        | 0.98 | 124  | .331 | [-0.07, 0.21] |
